# Supplementary material for: E3-ligase Skp2 predicts poor prognosis and maintains cancer stem cell pool in nasopharyngeal carcinoma
Source: PubMed Central journal article supplement (PMC4170633; doi:10.18632/oncotarget.2149), 2014-06-30
Supplement: oncotarget-05-5591-s001.pdf [file oncotarget-05-5591-s001.pdf]

# E3-ligase Skp2 predicts poor prognosis and maintains cancer stem cell pool in nasopharyngeal carcinoma

## Supplementary Material

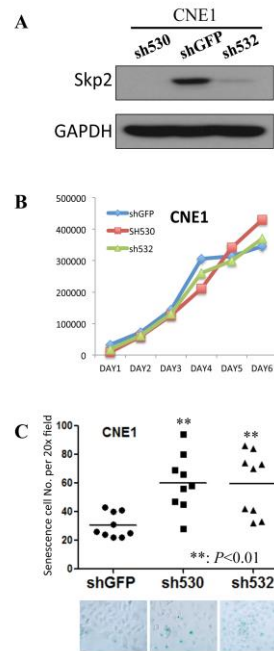

**Supplementary figure legends Figure S1: Skp2 deficiency does not affect cell proliferation but triggers cell senescence in NPC cell line CNE1** A: The knockdown efficiency of Skp2 in CNE1 cell. Both of the two fragments worked well in CNE1. B: The cell proliferation rate did not change significantly upon Skp2 knockdown in CNE1 cell. C: Cellular senescence was enhanced by both of the knockdown fragments in CNE1 cell (\*\*:  $p < 0.05$ ). Lower panels indicated the cell images under bright field.

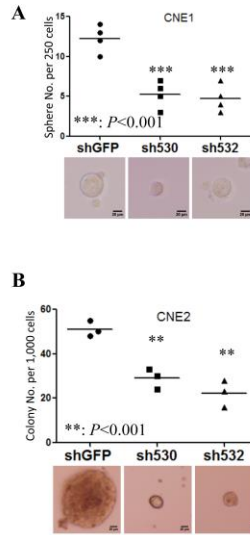

**Figure S2:** *Skp2* deficiency attenuated the self-renewal ability of NPC cell lines A: The sphere formation ability was reduced significantly in *Skp2* deficient CNE1 cell (\*\*\*;  $p < 0.001$ ). C, D: The soft agar colony formation ability reduced dramatically in *Skp2* deficient CNE2 cell (\*\*;  $p < 0.01$ ).

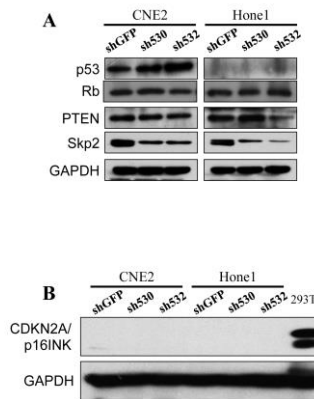

**Figure S3:** *Skp2* deficiency induced cellular senescence was not through PTEN, p19Arf/p53 or Rb/p16 pathways A: p53 was detected in CNE2 but not in Hone1. Levels of PTEN and Rb were comparable in *Skp2* silenced cells with control cells. B: p14(CDKN2A) and p16 was undetectable in CNE2 and Hone1 cells comparing to positive control HEK293T.
